# Supplementary material
Source: Springer Nature journal article supplement (https://www.springermedizin.de/resource/supplementary/12985_2007_266_MOESM1_ESM.pdf/9607666)

DPI

10

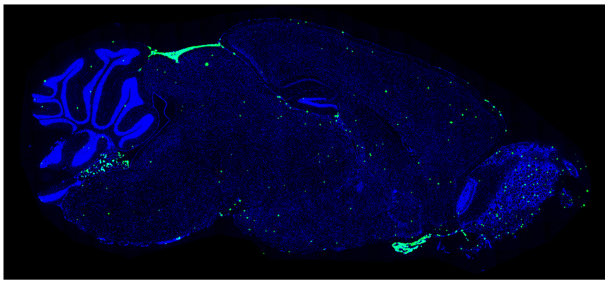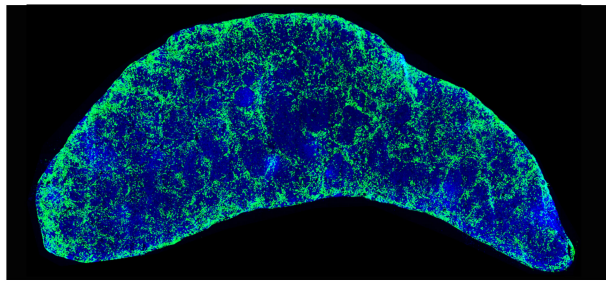

20

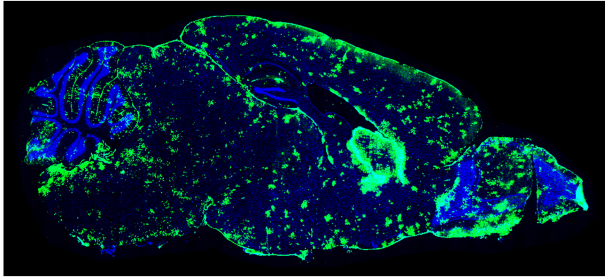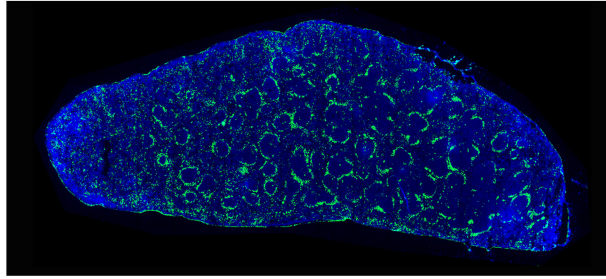

30

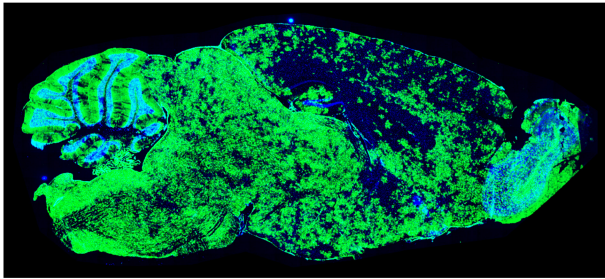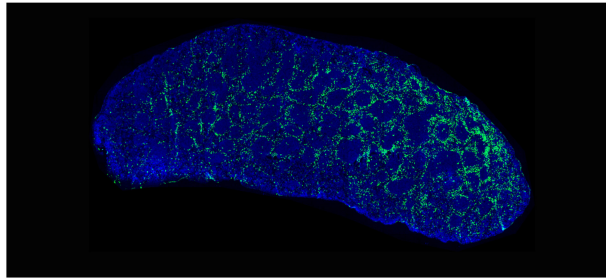

60

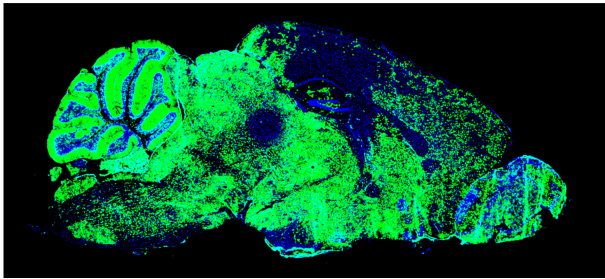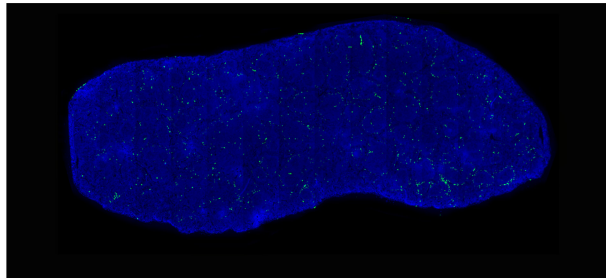

150

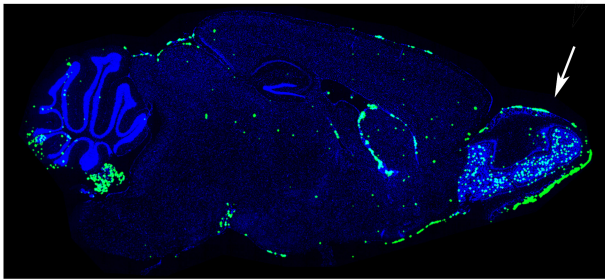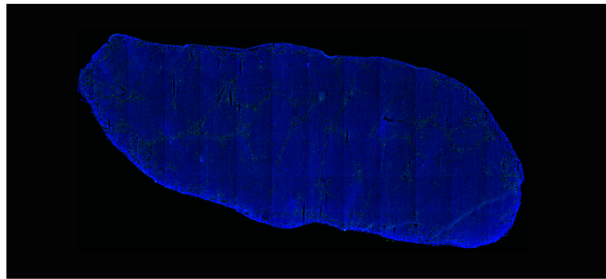

200

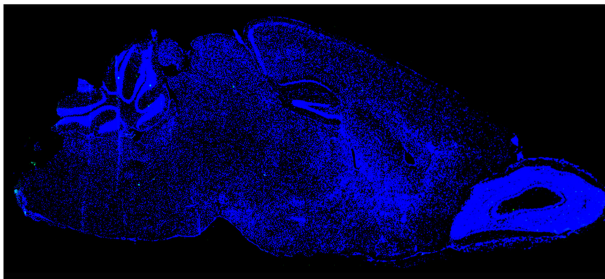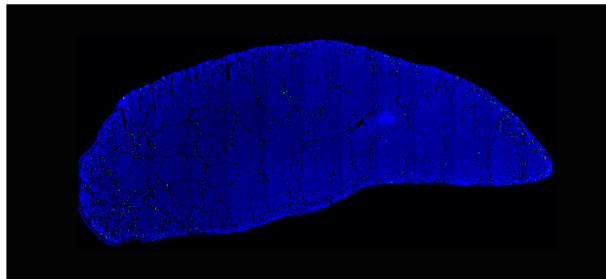

Supplement: MOESM1 [file 9607666]
